# Supplementary material for: The Antiviral Effects of Jasminin via Endogenous TNF-α and the Underlying TNF-α-Inducing Action
Source: Molecules. 2022 Feb 28;27(5):1598. doi: 10.3390/molecules27051598 (PMC8911969; doi:10.3390/molecules27051598)
Supplement: Supplementary file 1 [file molecules-27-01598-s001.zip › molecules-1604363-supplementary.pdf]

**A**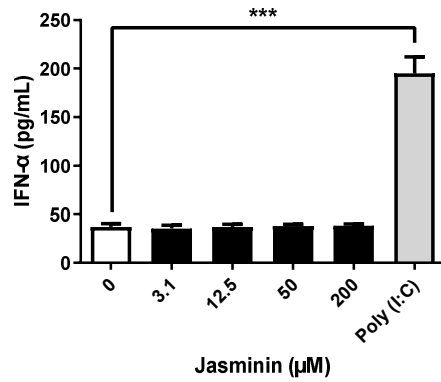**B**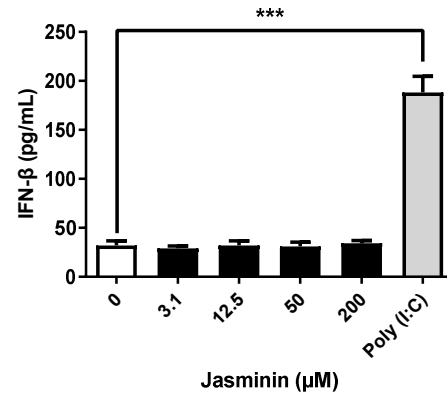

**Figure S1.** Effects of jasminin on expression of IFN- $\alpha$  and IFN- $\beta$  in RAW 264.7 cells. RAW 264.7 cells were stimulated with jasminin (3.1, 12.5, 50, and 200  $\mu$ M) for 24 h. IFN- $\alpha$  and IFN- $\beta$  were measured by ELISA after the cell culture supernatants were harvested, and 0.25  $\mu$ g/ml poly (I:C) was added as a positive control. \*\*\* $p$ <0.001 Values are expressed as mean  $\pm$  SD,  $n \geq 3$ . \*  $p$ <0.05, \*\* vs control (0: jasminin-untreated).

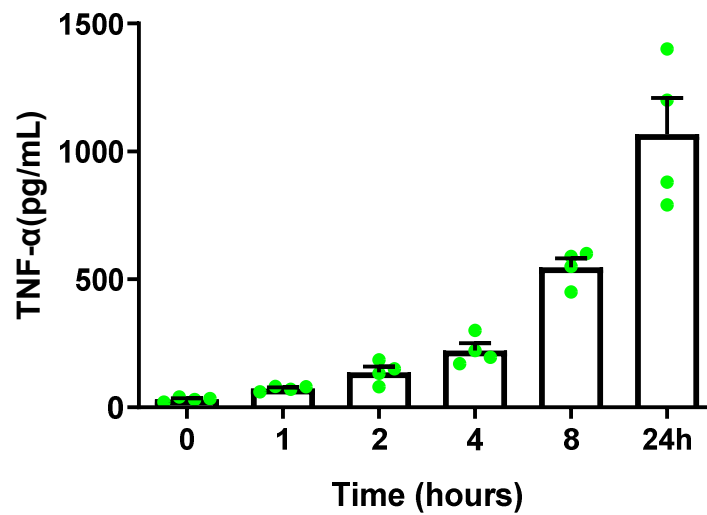

**Figure S2.** Kinetics of TNF- $\alpha$  production in RAW264.7 cells stimulated with jasminin (50  $\mu$ M). Supernatants collected at different times were tested for the presence of TNF- $\alpha$  using a commercial ELISA kit. Means  $\pm$  SD from four duplicate experiments.
